# Supplementary material
Source: PubMed Central journal article supplement (PMC3057863)
Supplement: supp_M110.183178_jbc.M110.183178-1.pdf [file supp_M110.183178_jbc.M110.183178-1.pdf]

## Supplementary Information

### ROTATIONAL POSITION OF A 5-METHYLCYTOSINE-CONTAINING CYCLOBUTANE PYRIMIDINE DIMER IN A NUCLEOSOME GREATLY AFFECTS ITS DEAMINATION RATE

Qian Song, Vincent J. Cannistraro, John-Stephen Taylor\*  
Department of Chemistry, Washington University, St. Louis, MO 63130

Address correspondence to: John-Stephen Taylor, PhD, Department of Chemistry, Campus Box 1134,  
Washington University, St. Louis, MO 63141. Fax: 314-935-4481; E-mail: [taylor@wustl.edu](mailto:taylor@wustl.edu).

| Figure                                                                                             | Page |
|----------------------------------------------------------------------------------------------------|------|
| <b>Fig. S1.</b> Ligation strategy for assembly of the 150-mer top strand substrates.               | S2   |
| <b>Fig. S2.</b> Sequences used to assemble the 150-mer top and bottom strands as shown in Fig. S1. | S3   |
| <b>Fig. S3.</b> Characterization and purification of the 150-mer DNA duplexes by PAGE.             | S4   |
| <b>Fig. S4.</b> Reconstitution of the nucleosome core particles with the 150-mer duplexes.         | S5   |
| <b>Fig. S5.</b> Linear regression analysis of the deamination rate data for CPD-IN.                | S7   |
| <b>Fig. S6.</b> Linear regression analysis of the deamination rate data for CPD-OUT.               | S8   |



*Top Strand Sequences*

*ds-OUT*

**1: 5'-TGT TAG AGC CTG TAA CTC GGT GTT AGA GCC TGT AAC TCG**

**2-OUT: GTG TTA GAG CCT GTA ACT CGG TGA TTG TAC A**

**3-OUT : T<sup>m</sup>C GTG T<sup>m</sup>CG TAG CCT GTA ACA GCC TGT TAG AGC CTG TAA CTC**

**4: GGT GTT AGA GCC TGT AAC TCG GTG TTA GAG CCT GTA ACT-3'**

*ds-IN and ds-control*

**5'-TGT TAG AGC CTG TAA CTC GGT GTT AGA GCC TGT AAC TCG**

**2-IN: GTG TTA GAG CCT GTA ACT CGG TGA TTG TAC A T<sup>m</sup>C GTG**

**3-IN: T<sup>m</sup>CG TAG CCT GTA ACA GCC TGT TAG AGC CTG TAA CTC**

**GGT GTT AGA GCC TGT AAC TCG GTG TTA GAG CCT GTA ACT-3'**

*Ligation Scaffolds*

**1-2 GCT CTA ACA CCG AGT TAC AG**

**2-3-OUT CTA CGA CAC GAT GTA CAA TC**

**2-3-IN ACA GGC TAC GAC ACG ATG TA**

**3-4 CTC TAA CAC CGA GTT ACA GG**

*Bottom Strand Sequence*

**1-AGT TAC AGG CTC TAA CAC CGA GTT ACA GGC TCT AA**

**2-CAC CGA GTT ACA GGC TCT AAC AGG CTG TTA CAG GCT ACG**

**3-ACA CGA TGT ACA ATC ACC GAG TTA CAG GCT CTA ACA C**

**4-CGA GTT ACA GGC TCT AAC ACC GAG TTA CAG GCT CTA ACA**

*Ligation Scaffolds*

**1-2: TAA CTC GGT GTT AGA GCC TG**

**2-3: TAC ATC GTG TCG TAG CCT GT**

**3-4: CTG TAA CTC GGT GTT AGA GC**

**Fig. S2.** Sequences used to assemble the 150-mer top and bottom strands as shown in Fig. S1.

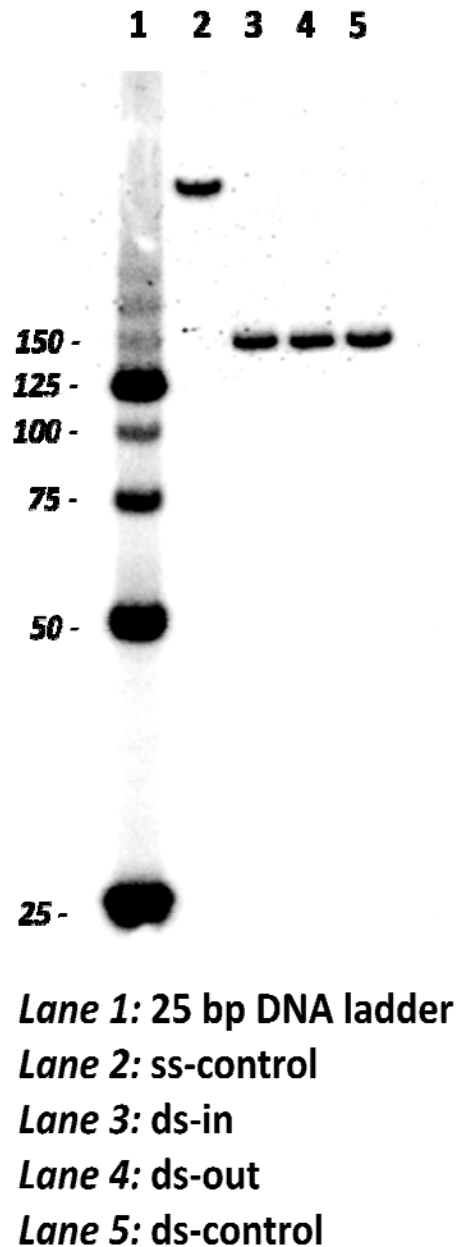

**Fig. S3.** Characterization and purification of the 150-mer DNA duplexes by PAGE. The PAGE-purified single strand 150-mer substrates were annealed together to form duplexes and characterized by native gel electrophoresis on a 10% acrylamide, 0.3% bisacrylamide polyacrylamide gel in TBE. Lane 1: 25 bp DNA ladder, lane 2: 5'-end-labeled single strand 150-mer, lane 3: 150-mer duplex with internally  $^{32}\text{P}$ -labeled facing out  $^m\text{C}$ , lane 4: 150-mer duplex with internally  $^{32}\text{P}$ -labeled facing in  $^m\text{C}$ , lane 5: 5'-end labeled 150-mer. Each duplex substrate was isolated from the gel for further studies.

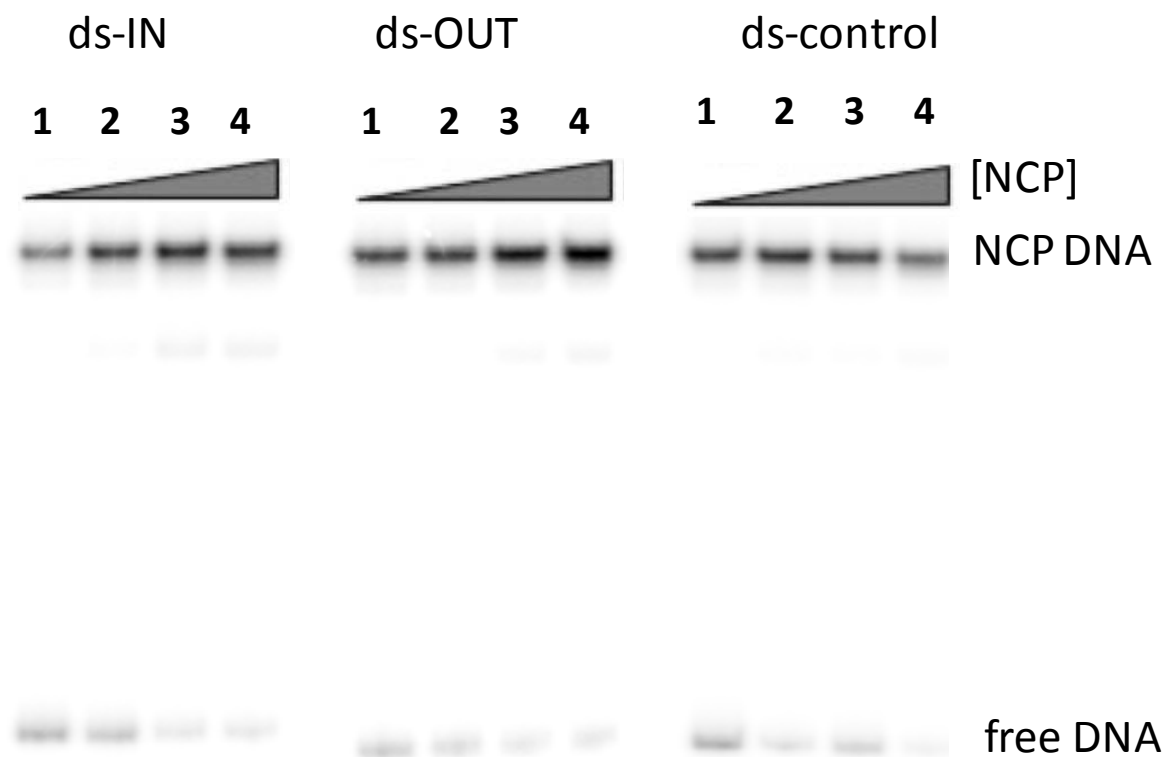

**Fig. S4.** Reconstitution of the nucleosome core particles with the 150-mer duplexes. The 150-mer DNA duplexes (10 nM) were incubated with increasing amounts of chicken erythrocyte nucleosome core particles (NCP) (lanes 1-4: 100, 200, 300, 500 nM) at room temperature in 2 M NaCl at pH 7.5 for 2 h followed by dialysis overnight at 4 °C in 50 mM NaCl, with final equilibration at 55°C for 2 h. The reconstituted NCP were then electrophoresed on a native polyacrylamide gel (6% acrylamide, 0.2% bisacrylamide in TBE).

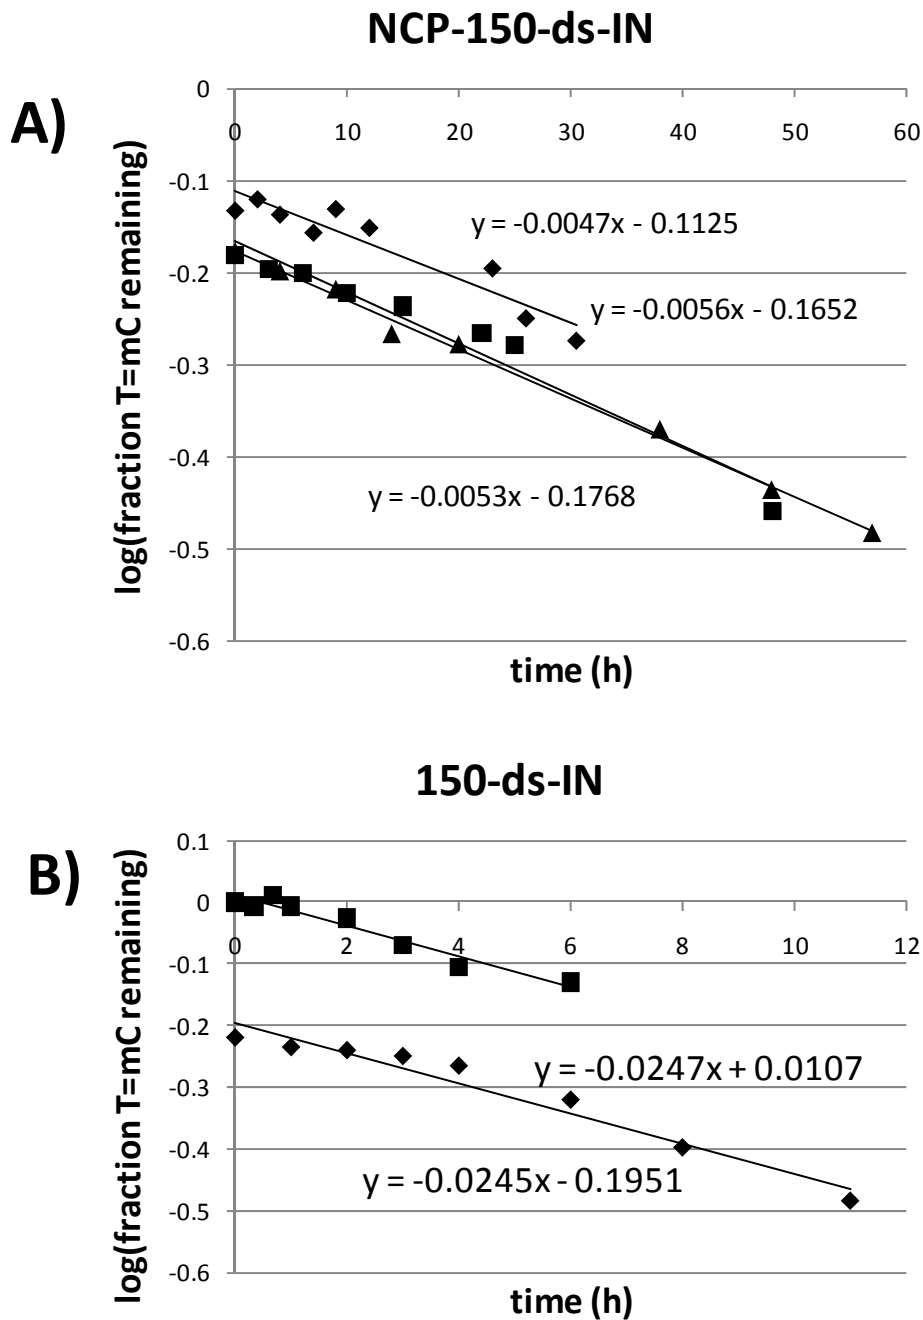

**Fig. S5.** Linear regression analysis of the deamination rate data for CPD-IN. Plots of the individual deamination rate data as  $\log(\text{fraction T}=\text{mC remaining})$  vs time for A) the NCP-ds-IN, and B) free ds-IN. The non-zero intercept is due to contamination from  $^{32}\text{pdT}$  resulting from labeling the 5'-end of the DNA 150-mer as a result of incomplete heat inactivation of the kinase prior to ligation.

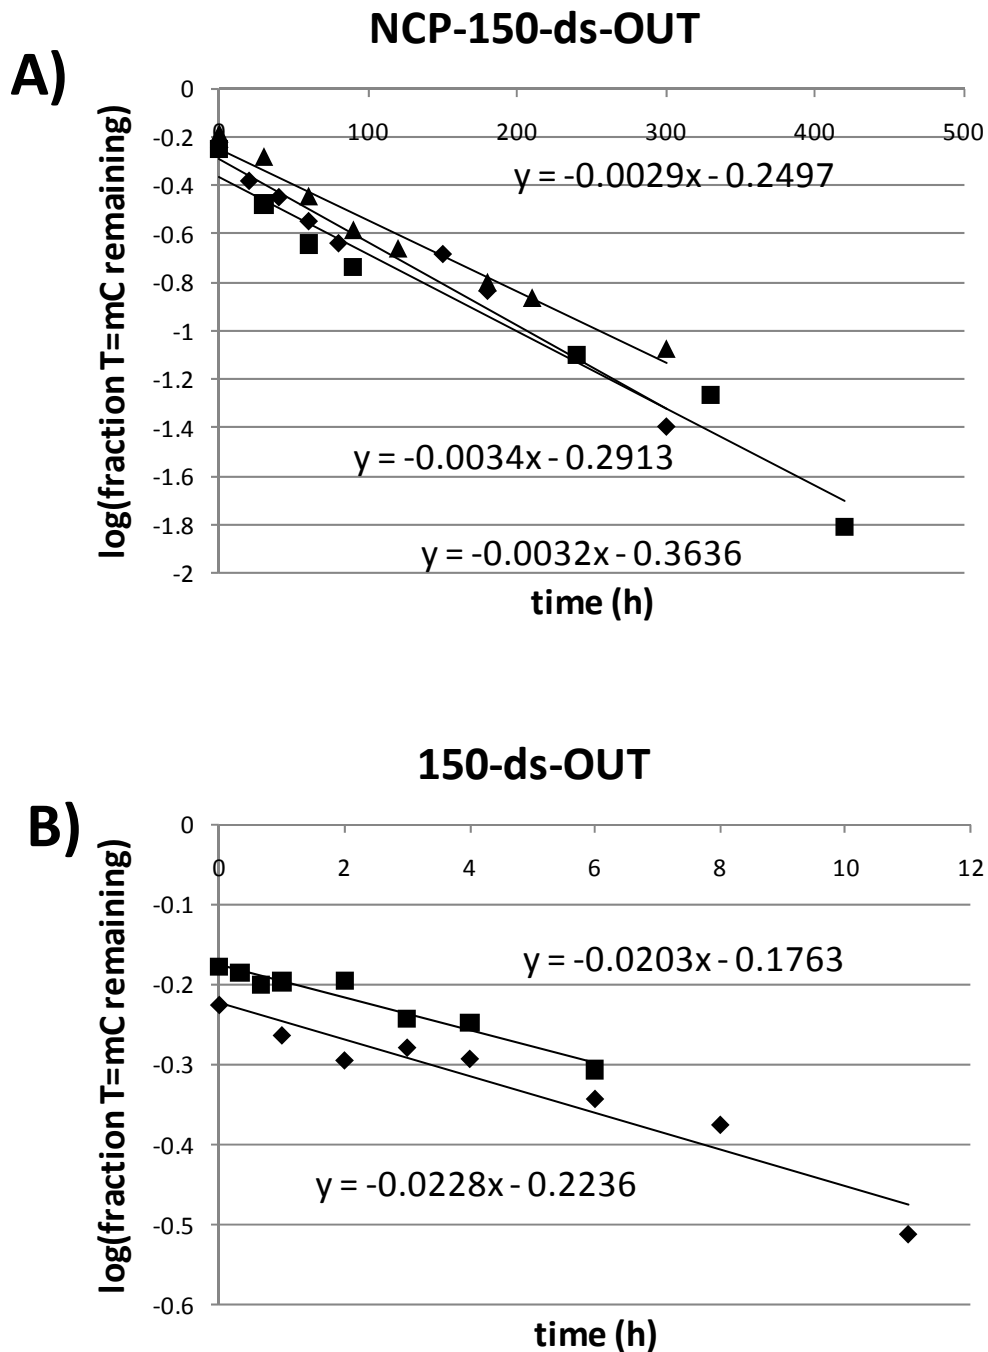

**Fig. S6.** Linear regression analysis of the deamination rate data for CPD-OUT. Plots of the individual deamination rate data as  $\log(\text{fraction T}=\text{mC remaining})$  vs time or A) NCP-ds-OUT, and B) free ds-OUT. The non-zero intercept is due to contamination from  $^{32}\text{pdT}$  resulting from labeling the 5'-end of the DNA 150-mer as a result of incomplete heat inactivation of the kinase prior to ligation.
